# Supplementary material
Source: publisher figshare collection journal article supplement (https://acs.figshare.com/ndownloader/files/13703792)
Supplement: Supplementary file 1 [file 13703792]

## Supporting Information

### Kinetic Isoconversion Loop Catalysis (KILCat): A Reactor Operation Mode to Investigate Slow Catalyst Deactivation Processes, with Ni/Al<sub>2</sub>O<sub>3</sub> for the Dry Reforming of Methane

Patrick Littlewood,<sup>1</sup> Eric Weitz,<sup>1</sup> Tobin J. Marks<sup>1\*</sup> and Peter C. Stair<sup>1\*</sup>

<sup>1</sup> Department of Chemistry, Northwestern University, Evanston, Illinois 60208 (USA)

\* [t-marks@northwestern.edu](mailto:t-marks@northwestern.edu), [pstair@northwestern.edu](mailto:pstair@northwestern.edu)

XPS data of spent catalysts was performed using a Thermo Scientific ESCALAB 250Xi.

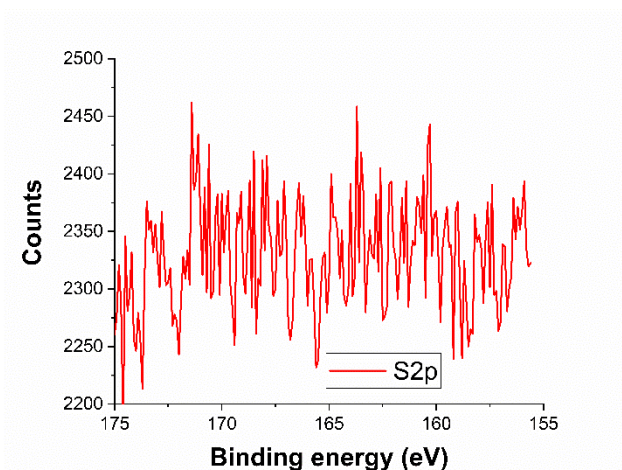

Figure S1: S2p region in the XPS spectrum of spot 1 on the spent catalyst after 80 h DRM. Spot size 500  $\mu$ m, step size 0.100 eV, averaged over 15 scans.

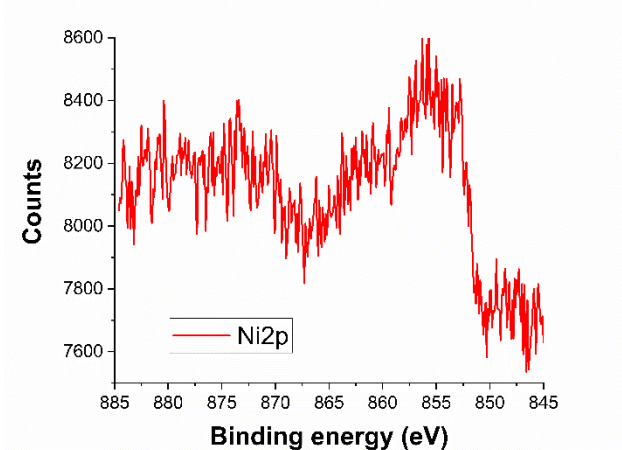

Figure S2: Ni2p region in the XPS spectrum of spot 1 on the spent catalyst after 80 h DRM. Spot size 500  $\mu$ m, step size 0.100 eV, averaged over 15 scans.

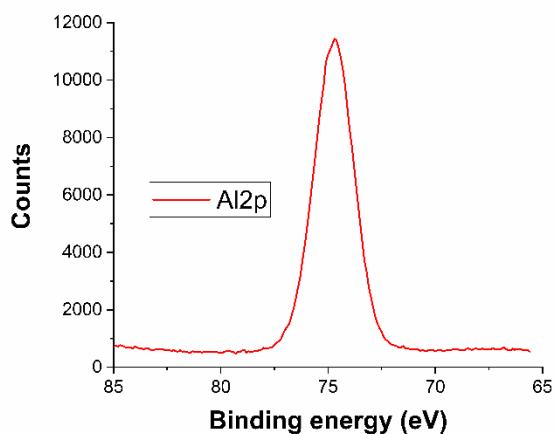

Figure S3: Al2p region in the XPS spectrum of spot 1 on the spent catalyst after 80 h DRM. Spot size 500  $\mu\text{m}$ , step size 0.100 eV, averaged over 15 scans.

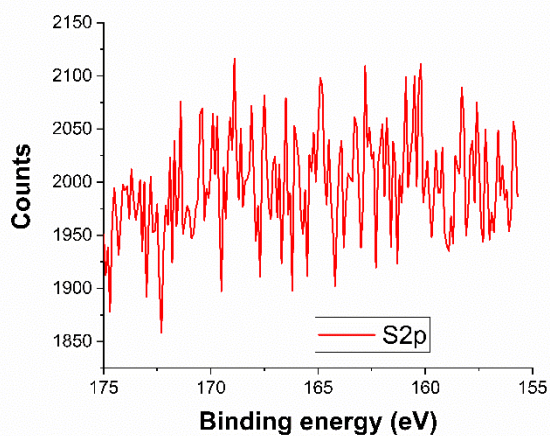

Figure S4: S2p region in the XPS spectrum of spot 2 on the spent catalyst after 80 h DRM. Spot size 500  $\mu\text{m}$ , step size 0.100 eV, averaged over 15 scans.

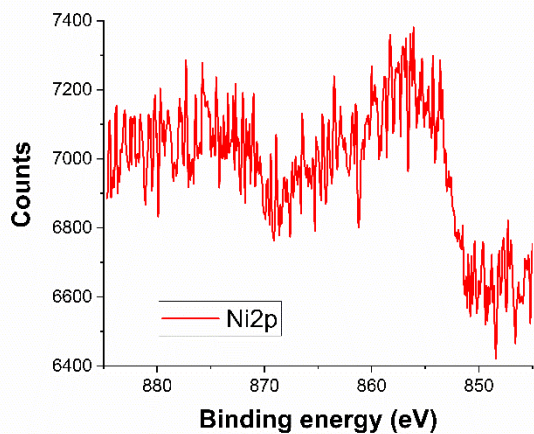

Figure S5: Ni2p region in the XPS spectrum of spot 2 on the spent catalyst after 80 h DRM. Spot size 500  $\mu\text{m}$ , step size 0.100 eV, averaged over 15 scans.

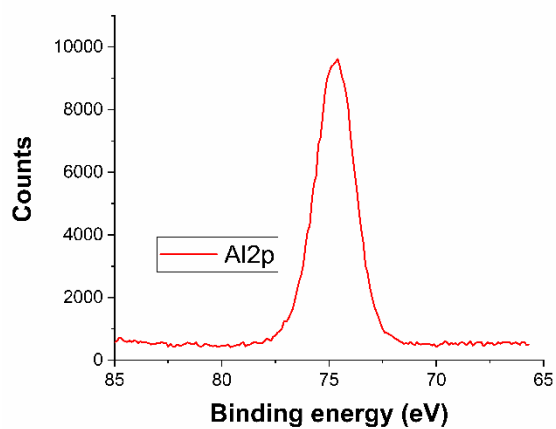

Figure S6: Al2p region in the XPS spectrum of spot 2 on the spent catalyst after 80 h DRM. Spot size 500  $\mu\text{m}$ , step size 0.100 eV, averaged over 5 scans.
